# Supplementary material for: Electrically driven formation and dynamics of swallow-tail solitons in smectic A liquid crystals
Source: Royal Society of Chemistry journal article supplement (doi:10.1039/d1ma00356a), 2021-01-01
Supplement: d1ma00356a1.pdf [file d1ma00356a1.pdf]

# Electrically driven formation and dynamics of Pac-Man solitons in smectic A liquid crystals

Yuan Shen <sup>a</sup>, and Ingo Dierking <sup>a\*</sup>

<sup>a</sup> Department of Physics, School of Natural Sciences, University of Manchester, Oxford Road, Manchester M13 9PL, UK.

\* Email: [ingo.dierking@manchester.ac.uk](mailto:ingo.dierking@manchester.ac.uk)

## Supplementary Figures

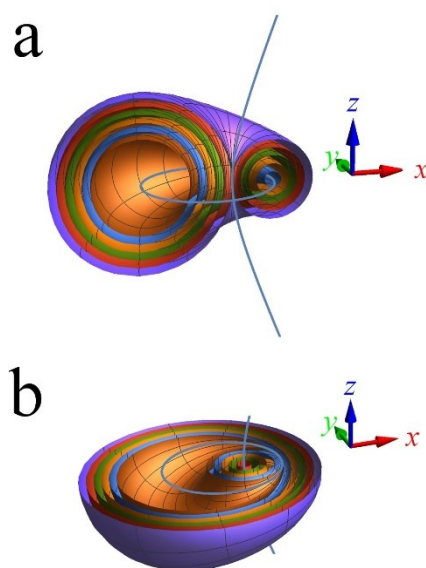

**Figure. S1.** A stack of three-dimensional Dupin cyclides cut along (a) the  $xz$  plane and (b) the  $xy$  plane. The blue lines depict the ellipse and the confocal hyperbola.

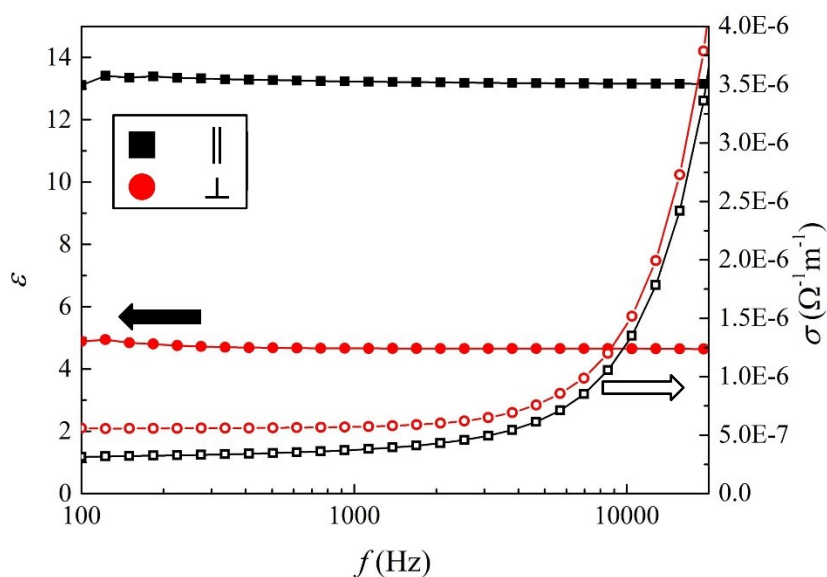

**Figure. S2.** Frequency dependence of dielectric permittivities (solid symbols) and

conductivities (hollow symbols) of 8CB at  $T = 34.0\text{ }^{\circ}\text{C}$ ,  $U = 0.1\text{ V}$ .

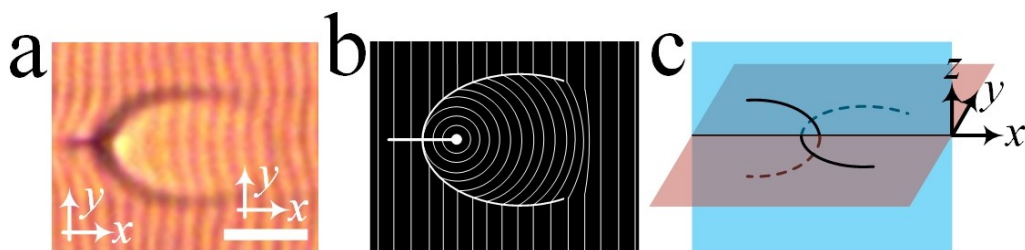

**Figure. S3.** Schematic structure of three-dimensional Pac-Man soliton. (a) Optical micrograph of a soliton at  $U = 6.6\text{ V}$ ,  $f = 50\text{ Hz}$ ,  $T = 34.6\text{ }^{\circ}\text{C}$ , scale bar  $10\text{ }\mu\text{m}$ . (b) Two-dimensional schematic structure of the soliton in the  $x$ - $y$  plane. (c) Three-dimensional schematic locus of the cusps of the soliton.

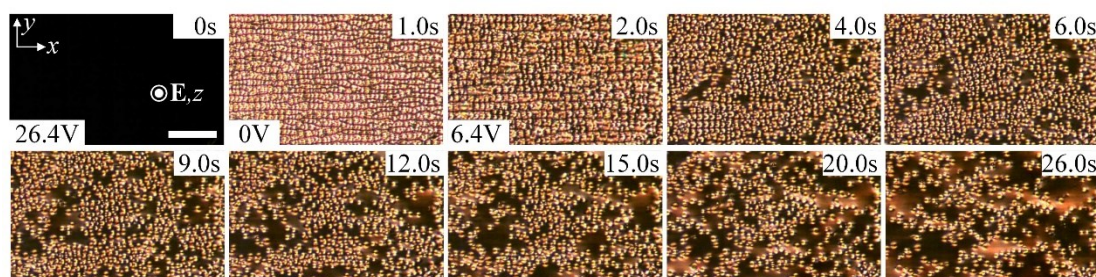

**Figure. S4.** Time series of micrographs of the dynamic transformation of the Pac-Man solitons from the focal conic domains in the scattering state.  $U$  changes from  $26.4\text{ V}$  to  $0\text{ V}$  to  $6.4\text{ V}$ ,  $f = 10\text{ Hz}$ ,  $T = 34.2\text{ }^{\circ}\text{C}$ , scale bar  $50\text{ }\mu\text{m}$ .

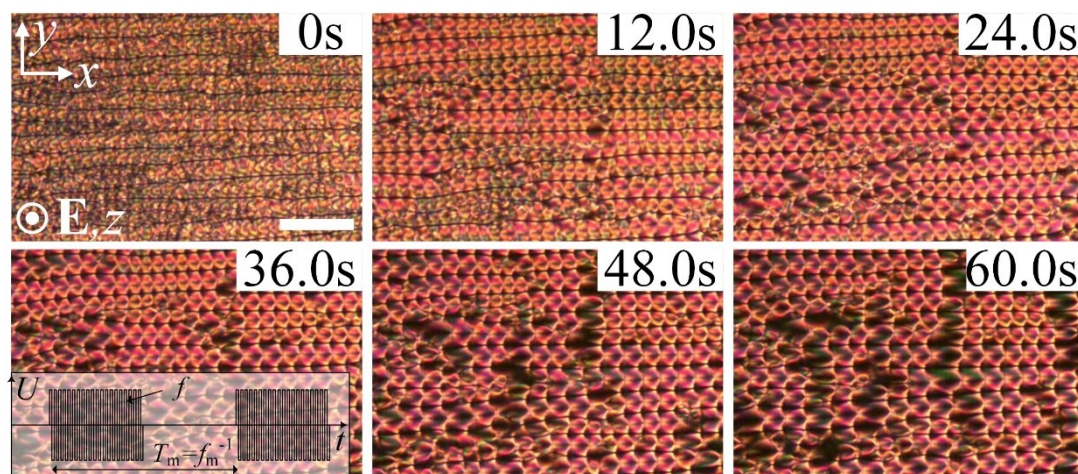

**Figure. S5.** Time series of micrographs of the dynamic transformation of the scattering state to the periodic soliton array.  $U = 7.0\text{ V}$ ,  $f = 5\text{ kHz}$ ,  $f_m = 10\text{ Hz}$ ,  $T = 34.6\text{ }^{\circ}\text{C}$ .

## Supplementary Movies

**Supplementary Movie 1:** Pac-Man solitons move along the  $x$ -axis with a constant speed.  $U = 6.0$  V,  $f = 2.0$  Hz,  $T = 34.8$  °C.

**Supplementary Movie 2:** Dynamic transformation of a Pac-Man soliton into an edge dislocation and back to a soliton. The voltage is changed between  $U = 6.4$  V and  $U = 8.0$  V,  $f = 2$  Hz,  $T = 34.6$  °C.

**Supplementary Movie 3:** Dynamic transformation of Pac-Man solitons into edge dislocations. The voltage is gradually increased from  $U = 5.6$  V to  $U = 7.2$  V, and then decreased back to  $U = 5.6$  V.  $f = 10$  Hz,  $T = 34.6$  °C.

**Supplementary Movie 4:** Dynamic motion of edge dislocations.  $U = 6.0$  V,  $f = 2$  Hz,  $T = 34.4$  °C.

**Supplementary Movie 5:** A Pac-Man soliton splits into two solitons.  $U = 6.4$  V,  $f = 2$  Hz,  $T = 34.6$  °C.

**Supplementary Movie 6:** Nucleation of Pac-Man solitons at a surface imperfection.  $U = 8.0$  V,  $f = 20$  Hz,  $T = 34.0$  °C.

**Supplementary Movie 7:** Disappearance of Pac-Man solitons at the ITO electrode.  $U = 6.8$  V,  $f = 2$  Hz,  $T = 34.1$  °C.

**Supplementary Movie 8:** Emergence of edge dislocations at the ITO electrode.  $U = 6.8$  V,  $f = 2$  Hz,  $T = 34.1$  °C.

**Supplementary Movie 9:** A chain of three Pac-Man solitons moving at a constant velocity.  $U = 6.6$  V,  $f = 50$  Hz,  $T = 34.6$  °C

**Supplementary Movie 10:** Linear chains of Pac-Man solitons moving on discontinuity walls.  $U = 8.0$  V,  $f = 10$  Hz,  $T = 34.0$  °C.

**Supplementary Movie 11:** Two Pac-Man solitons collide and pass through each other.  $U = 5.6$  V,  $f = 2$  Hz,  $T = 34.8$  °C.

**Supplementary Movie 12:** Two Pac-Man solitons collide head-on.  $U = 8.0$  V,  $f = 10$  Hz,  $T = 34.0$  °C.

**Supplementary Movie 13:** A Pac-Man soliton collides with a micro-particle ( $R_p = 3.0$  µm) and sticks to it.  $U = 5.4$  V,  $f = 10$  Hz,  $T = 34.4$  °C.

**Supplementary Movie 14:** A Pac-Man soliton collides with a micro-particle ( $R_p = 3.0 \mu\text{m}$ ) and moves away from it.  $U = 5.4 \text{ V}$ ,  $f = 10 \text{ Hz}$ ,  $T = 34.4 \text{ }^\circ\text{C}$ .

**Supplementary Movie 15:** Nucleation of Pac-Man solitons on a micro-particle ( $R_p = 1.5 \mu\text{m}$ ).  $U = 7.6 \text{ V}$ ,  $f = 10 \text{ Hz}$ ,  $T = 33.5 \text{ }^\circ\text{C}$ .

**Supplementary Movie 16:** Transformation of dynamic Pac-Man solitons from scattering state. Voltage is changed from  $U = 26.4 \text{ V}$  to  $U = 0 \text{ V}$  and then to  $U = 6.4 \text{ V}$ ,  $f = 10 \text{ Hz}$ .

**Supplementary Movie 17:** Dynamics of Pac-Man solitons at low temperatures.  $U = 18.0 \text{ V}$ ,  $f = 10 \text{ Hz}$ .
